# Supplementary material for: Most Random Gene Expression Signatures Are Significantly Associated with Breast Cancer Outcome
Source: PubMed Central journal article supplement (PMC3197658; doi:10.1371/journal.pcbi.1002240), 2011-10-20
Supplement: pcbi.1002240.s002.pdf [file pcbi.1002240.s002.pdf]

## The meta-PCNA signature

| SYMBOL        | GENENAME                                                                            | Entrez ID | PCNA correlation |
|---------------|-------------------------------------------------------------------------------------|-----------|------------------|
| PCNA          | proliferating cell nuclear antigen                                                  | 5111      | 1                |
| CKS2          | CDC28 protein kinase regulatory subunit 2                                           | 1164      | 0.85             |
| NUSAP1        | nucleolar and spindle associated protein 1                                          | 51203     | 0.83             |
| RRM2          | ribonucleotide reductase M2 polypeptide                                             | 6241      | 0.83             |
| ZWINT         | ZW10 interactor                                                                     | 11130     | 0.83             |
| PRC1          | protein regulator of cytokinesis 1                                                  | 9055      | 0.82             |
| TFDP1         | transcription factor Dp-1                                                           | 7027      | 0.82             |
| CCNA2         | cyclin A2                                                                           | 890       | 0.81             |
| CCNB1         | cyclin B1                                                                           | 891       | 0.81             |
| MELK          | maternal embryonic leucine zipper kinase                                            | 9833      | 0.81             |
| TPX2          | TPX2, microtubule-associated, homolog (Xenopus laevis)                              | 22974     | 0.81             |
| BIRC5         | baculoviral IAP repeat-containing 5 (survivin)                                      | 332       | 0.8              |
| NCAPG2        | non-SMC condensin II complex, subunit G2                                            | 54892     | 0.8              |
| RFWD3         | ring finger and WD repeat domain 3                                                  | 55159     | 0.8              |
| TACC3         | transforming, acidic coiled-coil containing protein 3                               | 10460     | 0.8              |
| CDC2          | cell division cycle 2, G1 to S and G2 to M                                          | 983       | 0.79             |
| KIAA0101      | KIAA0101                                                                            | 9768      | 0.79             |
| MCM2          | MCM2 minichromosome maintenance deficient 2, mitotin (S. cerevisiae)                | 4171      | 0.79             |
| MCM5          | MCM5 minichromosome maintenance deficient 5, cell division cycle 46 (S. cerevisiae) | 4174      | 0.79             |
| ASF1B         | ASF1 anti-silencing function 1 homolog B (S. cerevisiae)                            | 55723     | 0.78             |
| CCNB2         | cyclin B2                                                                           | 9133      | 0.78             |
| GTPBP2        | GTP binding protein 2                                                               | 54676     | 0.78             |
| KIF20A        | kinesin family member 20A                                                           | 10112     | 0.78             |
| PTTG1         | pituitary tumor-transforming 1                                                      | 9232      | 0.78             |
| AURKA         | aurora kinase A                                                                     | 6790      | 0.77             |
| CDC20         | cell division cycle 20 homolog (S. cerevisiae)                                      | 991       | 0.77             |
| DKFZp762E1312 | hypothetical protein DKFZp762E1312                                                  | 55355     | 0.77             |
| FOXM1         | forkhead box M1                                                                     | 2305      | 0.77             |
| GINS2         | GINS complex subunit 2 (Psf2 homolog)                                               | 51659     | 0.77             |
| MAD2L1        | MAD2 mitotic arrest deficient-like 1 (yeast)                                        | 4085      | 0.77             |
| UBE2C         | ubiquitin-conjugating enzyme E2C                                                    | 11065     | 0.77             |
| GINS1         | GINS complex subunit 1 (Psf1 homolog)                                               | 9837      | 0.76             |
| MCM6          | minichromosome maintenance deficient 6 homolog (S. cerevisiae)                      | 4175      | 0.76             |
| NCAPD2        | non-SMC condensin I complex, subunit D2                                             | 9918      | 0.76             |
| NUP37         | nucleoporin 37kDa                                                                   | 79023     | 0.76             |
| CKS1B         | CDC28 protein kinase regulatory subunit 1B                                          | 1163      | 0.75             |
| LOC146909     | hypothetical protein LOC146909                                                      | 146909    | 0.75             |
| MCM7          | MCM7 minichromosome maintenance deficient 7 (S. cerevisiae)                         | 4176      | 0.75             |
| ARID3A        | AT rich interactive domain 3A (BRIGHT-like)                                         | 1820      | 0.74             |
| AURKB         | aurora kinase B                                                                     | 9212      | 0.74             |
| CDCA8         | cell division cycle associated 8                                                    | 55143     | 0.74             |
| SNRPD1        | small nuclear ribonucleoprotein D1 polypeptide 16kDa                                | 6632      | 0.74             |
| TROAP         | trophinin associated protein (tastin)                                               | 10024     | 0.74             |
| C21orf45      | chromosome 21 open reading frame 45                                                 | 54069     | 0.73             |
| DDX39         | DEAD (Asp-Glu-Ala-Asp) box polypeptide 39                                           | 10212     | 0.73             |
| ERAF          | erythroid associated factor                                                         | 51327     | 0.73             |
| ESPL1         | extra spindle pole bodies homolog 1 (S. cerevisiae)                                 | 9700      | 0.73             |
| HMBS          | hydroxymethylbilane synthase                                                        | 3145      | 0.73             |
| LSM6          | LSM6 homolog, U6 small nuclear RNA associated (S. cerevisiae)                       | 11157     | 0.73             |
| MCM4          | MCM4 minichromosome maintenance deficient 4 (S. cerevisiae)                         | 4173      | 0.73             |
| NCAPD3        | non-SMC condensin II complex, subunit D3                                            | 23310     | 0.73             |
| PPIH          | peptidylprolyl isomerase H (cyclophilin H)                                          | 10465     | 0.73             |

|          |                                                                              |        |      |
|----------|------------------------------------------------------------------------------|--------|------|
| CDC45L   | CDC45 cell division cycle 45-like ( <i>S. cerevisiae</i> )                   | 8318   | 0.72 |
| DTL      | denticleless homolog ( <i>Drosophila</i> )                                   | 51514  | 0.72 |
| EPB42    | erythrocyte membrane protein band 4.2                                        | 2038   | 0.72 |
| HMGN2    | high-mobility group nucleosomal binding domain 2                             | 3151   | 0.72 |
| MCM3     | MCM3 minichromosome maintenance deficient 3 ( <i>S. cerevisiae</i> )         | 4172   | 0.72 |
| PF4      | platelet factor 4 (chemokine (C-X-C motif) ligand 4)                         | 5196   | 0.72 |
| PPBP     | pro-platelet basic protein (chemokine (C-X-C motif) ligand 7)                | 5473   | 0.72 |
| RFC4     | replication factor C (activator 1) 4, 37kDa                                  | 5984   | 0.72 |
| TOP2A    | topoisomerase (DNA) II alpha 170kDa                                          | 7153   | 0.72 |
| BUB1B    | BUB1 budding uninhibited by benzimidazoles 1 homolog beta (yeast)            | 701    | 0.71 |
| CDT1     | chromatin licensing and DNA replication factor 1                             | 81620  | 0.71 |
| FEN1     | flap structure-specific endonuclease 1                                       | 2237   | 0.71 |
| GATA1    | GATA binding protein 1 (globin transcription factor 1)                       | 2623   | 0.71 |
| GYPB     | glycophorin B (MNS blood group)                                              | 2994   | 0.71 |
| HMGB2    | high-mobility group box 2                                                    | 3148   | 0.71 |
| KIF22    | kinesin family member 22                                                     | 3835   | 0.71 |
| KLF1     | Kruppel-like factor 1 (erythroid)                                            | 10661  | 0.71 |
| MLF1IP   | MLF1 interacting protein                                                     | 79682  | 0.71 |
| RFC3     | replication factor C (activator 1) 3, 38kDa                                  | 5983   | 0.71 |
| RHCE     | Rh blood group, CcEe antigens                                                | 6006   | 0.71 |
| TAL1     | T-cell acute lymphocytic leukemia 1                                          | 6886   | 0.71 |
| TCF3     | transcription factor 3 (E2A immunoglobulin enhancer binding factors E12/E47) | 6929   | 0.71 |
| ALAS2    | aminolevulinate, delta-, synthase 2 (sideroblastic/hypochromic anemia)       | 212    | 0.7  |
| BZRPL1   | benzodiazapine receptor (peripheral)-like 1                                  | 222642 | 0.7  |
| CDCA3    | cell division cycle associated 3                                             | 83461  | 0.7  |
| CENPA    | centromere protein A                                                         | 1058   | 0.7  |
| CKLF     | chemokine-like factor                                                        | 51192  | 0.7  |
| GTSE1    | G-2 and S-phase expressed 1                                                  | 51512  | 0.7  |
| NFE2     | nuclear factor (erythroid-derived 2), 45kDa                                  | 4778   | 0.7  |
| OIP5     | Opa interacting protein 5                                                    | 11339  | 0.7  |
| SHCBP1   | SHC SH2-domain binding protein 1                                             | 79801  | 0.7  |
| SNF8     | SNF8, ESCRT-II complex subunit, homolog ( <i>S. cerevisiae</i> )             | 11267  | 0.7  |
| SNRNP    | small nuclear ribonucleoprotein polypeptides B and B1                        | 6628   | 0.7  |
| SPTA1    | spectrin, alpha, erythrocytic 1 (elliptocytosis 2)                           | 6708   | 0.7  |
| KEL      | Kell blood group, metallo-endopeptidase                                      | 3792   | 0.69 |
| KIF2C    | kinesin family member 2C                                                     | 11004  | 0.69 |
| LYL1     | lymphoblastic leukemia derived sequence 1                                    | 4066   | 0.69 |
| PSMD9    | proteasome (prosome, macropain) 26S subunit, non-ATPase, 9                   | 5715   | 0.69 |
| RACGAP1  | Rac GTPase activating protein 1                                              | 29127  | 0.69 |
| RPIA     | ribose 5-phosphate isomerase A (ribose 5-phosphate epimerase)                | 22934  | 0.69 |
| TIMELESS | timeless homolog ( <i>Drosophila</i> )                                       | 8914   | 0.69 |
| TRMT5    | TRM5 tRNA methyltransferase 5 homolog ( <i>S. cerevisiae</i> )               | 57570  | 0.69 |
| TYMS     | thymidylate synthetase                                                       | 7298   | 0.69 |
| VRK1     | vaccinia related kinase 1                                                    | 7443   | 0.69 |
| FBXO7    | F-box protein 7                                                              | 25793  | 0.68 |
| H3F3A    | H3 histone, family 3A                                                        | 3020   | 0.68 |
| NUDT1    | nudix (nucleoside diphosphate linked moiety X)-type motif 1                  | 4521   | 0.68 |
| PLEK     | pleckstrin                                                                   | 5341   | 0.68 |
| POLE2    | polymerase (DNA directed), epsilon 2 (p59 subunit)                           | 5427   | 0.68 |
| RHAG     | Rh-associated glycoprotein                                                   | 6005   | 0.68 |
| WHSC1    | Wolf-Hirschhorn syndrome candidate 1                                         | 7468   | 0.68 |
| APOBEC3B | apolipoprotein B mRNA editing enzyme, catalytic polypeptide-like 3B          | 9582   | 0.67 |
| BPGM     | 2,3-bisphosphoglycerate mutase                                               | 669    | 0.67 |
| CHAF1A   | chromatin assembly factor 1, subunit A (p150)                                | 10036  | 0.67 |

|          |                                                                                    |       |      |
|----------|------------------------------------------------------------------------------------|-------|------|
| DNAJC9   | DnaJ (Hsp40) homolog, subfamily C, member 9                                        | 23234 | 0.67 |
| FBXO5    | F-box protein 5                                                                    | 26271 | 0.67 |
| KIF4A    | kinesin family member 4A                                                           | 24137 | 0.67 |
| KLF15    | Kruppel-like factor 15                                                             | 28999 | 0.67 |
| MKI67    | antigen identified by monoclonal antibody Ki-67                                    | 4288  | 0.67 |
| PGD      | phosphogluconate dehydrogenase                                                     | 5226  | 0.67 |
| RPA3     | replication protein A3, 14kDa                                                      | 6119  | 0.67 |
| SFRS2    | splicing factor, arginine/serine-rich 2                                            | 6427  | 0.67 |
| TRIM58   | tripartite motif-containing 58                                                     | 25893 | 0.67 |
| ADAMTS13 | ADAM metalloproteinase with thrombospondin type 1 motif, 13                        | 11093 | 0.66 |
| CDCA4    | cell division cycle associated 4                                                   | 55038 | 0.66 |
| CDKN3    | cyclin-dependent kinase inhibitor 3 (CDK2-associated dual specificity phosphatase) | 1033  | 0.66 |
| FECH     | ferrochelatase (protoporphyrin)                                                    | 2235  | 0.66 |
| LBR      | lamin B receptor                                                                   | 3930  | 0.66 |
| LIG1     | ligase I, DNA, ATP-dependent                                                       | 3978  | 0.66 |
| LMNB1    | lamin B1                                                                           | 4001  | 0.66 |
| MICB     | MHC class I polypeptide-related sequence B                                         | 4277  | 0.66 |
| NUP210   | nucleoporin 210kDa                                                                 | 23225 | 0.66 |
| ORC6L    | origin recognition complex, subunit 6 like (yeast)                                 | 23594 | 0.66 |
| RAD51AP1 | RAD51 associated protein 1                                                         | 10635 | 0.66 |
| RHD      | Rh blood group, D antigen                                                          | 6007  | 0.66 |
| SMC4     | structural maintenance of chromosomes 4                                            | 10051 | 0.66 |
| GYPA     | glycophorin A (MNS blood group)                                                    | 2993  | 0.65 |
| RPP30    | ribonuclease P/MRP 30kDa subunit                                                   | 10556 | 0.65 |
| TRIM10   | tripartite motif-containing 10                                                     | 10107 | 0.65 |
